# S2 Fig.

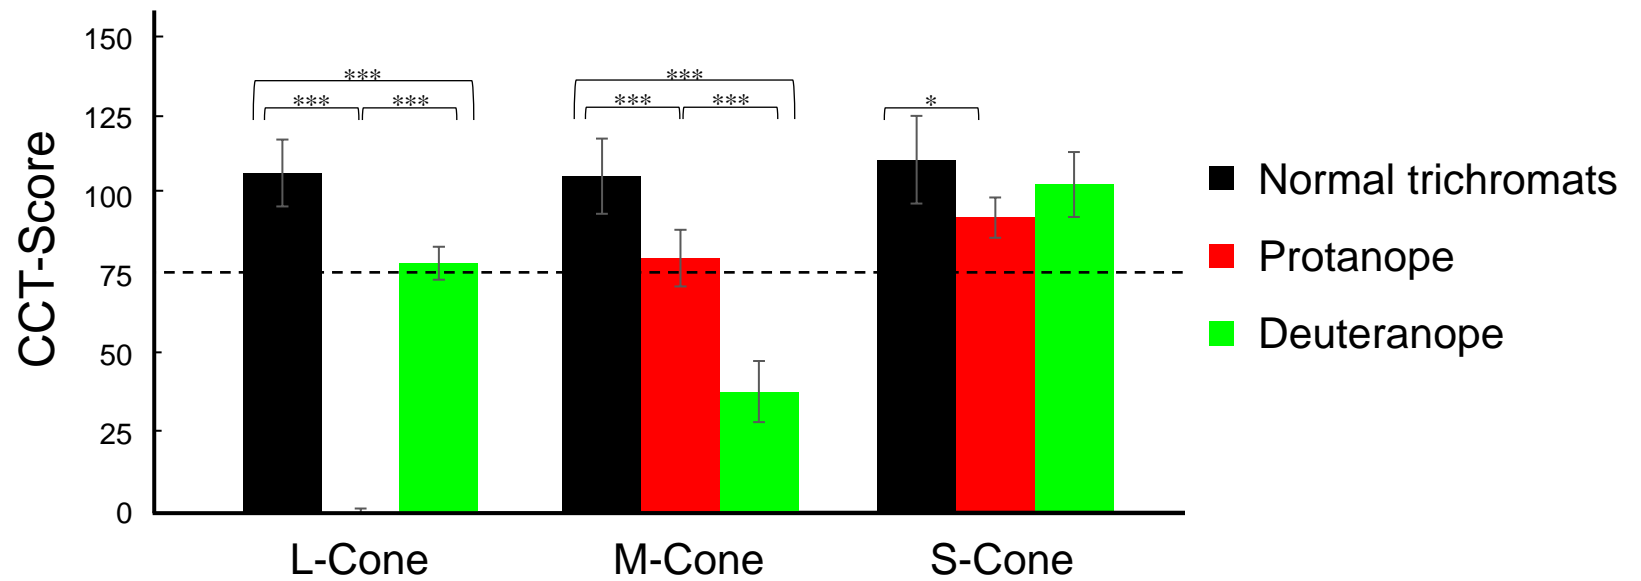

Source: https://storage.googleapis.com/plos-corpus-prod/10.1371/journal.pone.0274824/1/pone.0274824.s002.pdf
